# Supplementary material for: Negative magnetoresistance in different nitrogen content EuNbO3−xNx single-crystalline thin films
Source: Royal Society of Chemistry journal article supplement (doi:10.1039/d2tc03328c), 2022-01-01
Supplement: d2tc03328c1.pdf [file d2tc03328c1.pdf]

## Supplementary information

# Negative magnetoresistance in different nitrogen content $\text{EuNbO}_{3-x}\text{N}_x$ single-crystalline thin films

Takahiro Maruyama <sup>a</sup>, Yasushi Hirose <sup>b</sup>, Tsukasa Katayama <sup>c,d</sup>, Yuki Sugisawa <sup>e</sup>,

Daiichiro Sekiba <sup>e</sup>, Tetsuya Hasegawa <sup>a,f</sup>, and Akira Chikamatsu <sup>\*f</sup>

<sup>a</sup>*Department of Chemistry, The University of Tokyo, 7-3-1 Hongo, Bunkyo-ku, Tokyo 113-0033, Japan*

<sup>b</sup>*Department of Chemistry, Tokyo Metropolitan University, 1-1 Minami Osawa, Hachioji, Tokyo 192-0397, Japan*

<sup>c</sup>*Research Institute for Electronic Science, Hokkaido University, N20W10, Kita, Sapporo 001-0020, Japan*

<sup>d</sup>*JST PRESTO, 4-1-8 Honcho, Kawaguchi, Saitama 332-0012, Japan*

<sup>e</sup>*Graduate School of Pure and Applied Sciences, University of Tsukuba, 1-1-1 Tennodai, Tsukuba, Ibaraki 305-8573, Japan*

<sup>f</sup>*Department of Chemistry, Faculty of Science, Ochanomizu University, 2-1-1 Otsuka, Bunkyo-ku, Tokyo 112-8610, Japan*

## Analysis of the nitrogen contents of thin films through RBS and ERDA

The N/Eu ratios of the films were accurately determined via Rutherford backscattering spectrometry (RBS) and elastic recoil detection analysis (ERDA) using the following steps:

1. First, as the stopping powers of RBS and ERDA are different, it is necessary to clarify the relation between the two powers by stoichiometric oxides. The ratio of the stopping power of RBS ( $\Omega_{\text{RBS}}$ ) to that of ERDA ( $\Omega_{\text{ERDA}}$ ) ( $\Omega_{\text{RBS}}/\Omega_{\text{ERDA}}$ ) was estimated using ZnO for sample 1S (EuNbO<sub>2.4</sub>N<sub>0.6</sub> film on STO) and sample 2S (EuNbO<sub>2.3</sub>N<sub>0.7</sub> film on STO) and ZrO<sub>2</sub> for sample 3S (EuNbO<sub>2.0</sub>N<sub>1.0</sub> film on STO). As the ZrO<sub>2</sub> sample contained a small amount of Hf, we assumed that  $N_{\text{Zr}} + N_{\text{Hf}} = 2$ .  $\Omega_{\text{RBS}}/\Omega_{\text{ERDA}}$  was determined according to the following formulae:

$$\frac{\Omega_{\text{RBS}}}{\Omega_{\text{ERDA}}} = \frac{N_{\text{O}}}{N_{\text{Zn}}} \frac{Y_{\text{Zn}}/\sigma_{\text{Zn}}}{Y_{\text{O}}/\sigma_{\text{O}}} \text{ for samples 1S and 2S}$$

$$\frac{\Omega_{\text{RBS}}}{\Omega_{\text{ERDA}}} = \frac{N_{\text{O}}}{N_{\text{Zr}}+N_{\text{Hf}}} \frac{Y_{\text{Zr}}/\sigma_{\text{Zr}}+Y_{\text{Hf}}/\sigma_{\text{Hf}}}{Y_{\text{O}}/\sigma_{\text{O}}} \text{ for sample 3S}$$

where N, Y, and  $\sigma$  are the number of atoms in the formula weight, total counts measured in the spectrum, and differential scattering cross section, respectively. The differential scattering cross section of each element was calculated using the SIMNRA program.  $Y_{\text{Zn}}$  and  $Y_{\text{Hf}}$  were obtained from the RBS spectrum and  $Y_{\text{O}}$  from the ERDA spectrum.

2. Eu/N was obtained by substituting the values of the stopping power ratio into the following formula:

$$\frac{N_N}{N_{Eu}} = \frac{Y_N / \sigma_N}{Y_{Eu} / \sigma_{Eu}} \frac{\Omega_{RBS}}{\Omega_{ERDA}}$$

where  $Y_{Eu}$  and  $Y_N$  were obtained from the RBS spectrum. N recoil spectra were extracted from the ERDA spectrum for each sample. The differential scattering cross section of each element was also calculated using the SIMNRA program, similar to the first step.

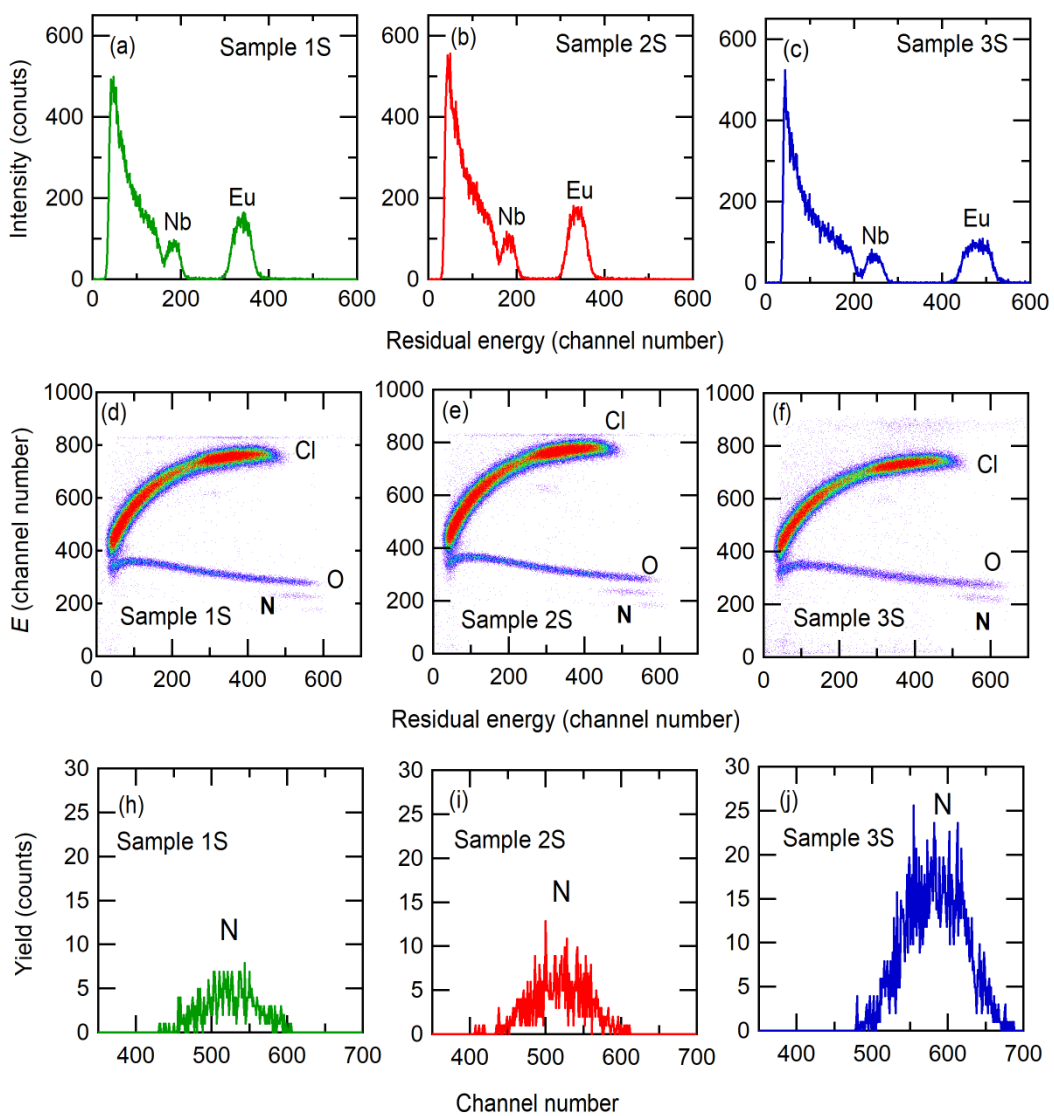

**Figure S1.** RBS spectra of samples (a) 1S, (b) 2S, and (c) 3S.  $\Delta E$  vs. residual energy ERDA histograms of samples (d) 1S, (e) 2S, and (f) 3S. (h), (i), and (j) show the N recoil spectra extracted from (c), (d), and (e) respectively, which are obtained by integration along  $\Delta E$ .

|                                            | Sample 1S | Sample 2S | Sample 3S |
|--------------------------------------------|-----------|-----------|-----------|
| $\Omega_{\text{RBS}}/\Omega_{\text{ERDA}}$ | 8.93      | 8.93      | 9.77      |
| $Y_{\text{Eu}}$                            | 7233      | 8095      | 20749     |
| $Y_{\text{N}}$                             | 430       | 575       | 1805      |
| $\sigma_{\text{Eu}}$                       | 1044.8    | 1044.8    | 1044.8    |
| $\sigma_{\text{N}}$                        | 935       | 935       | 935       |
| $N_{\text{N}}/N_{\text{Eu}}$               | 0.59      | 0.71      | 0.95      |

**Table S1.** Values of  $Y_{\text{N}}$ ,  $Y_{\text{Eu}}$ ,  $\sigma_{\text{N}}$ ,  $\sigma_{\text{Eu}}$ ,  $\Omega_{\text{RBS}}/\Omega_{\text{ERDA}}$  and  $N_{\text{N}}/N_{\text{Eu}}$ .

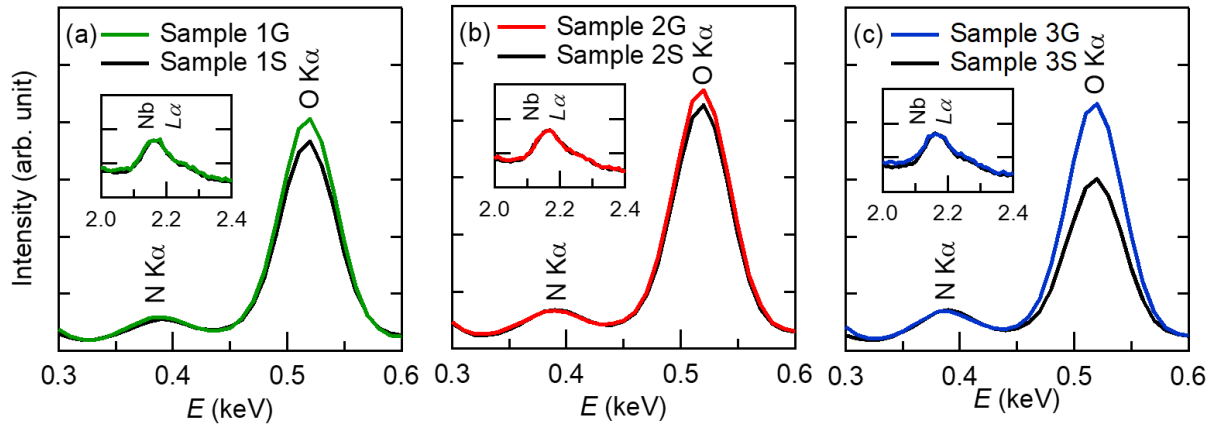

**Figure S2.** EDS spectra of the ENON films fabricated on GSO and STO, where each spectrum is normalized by the Nb  $L\alpha$  peak. (Insets show the Nb  $L\alpha$  peak of each spectrum.)

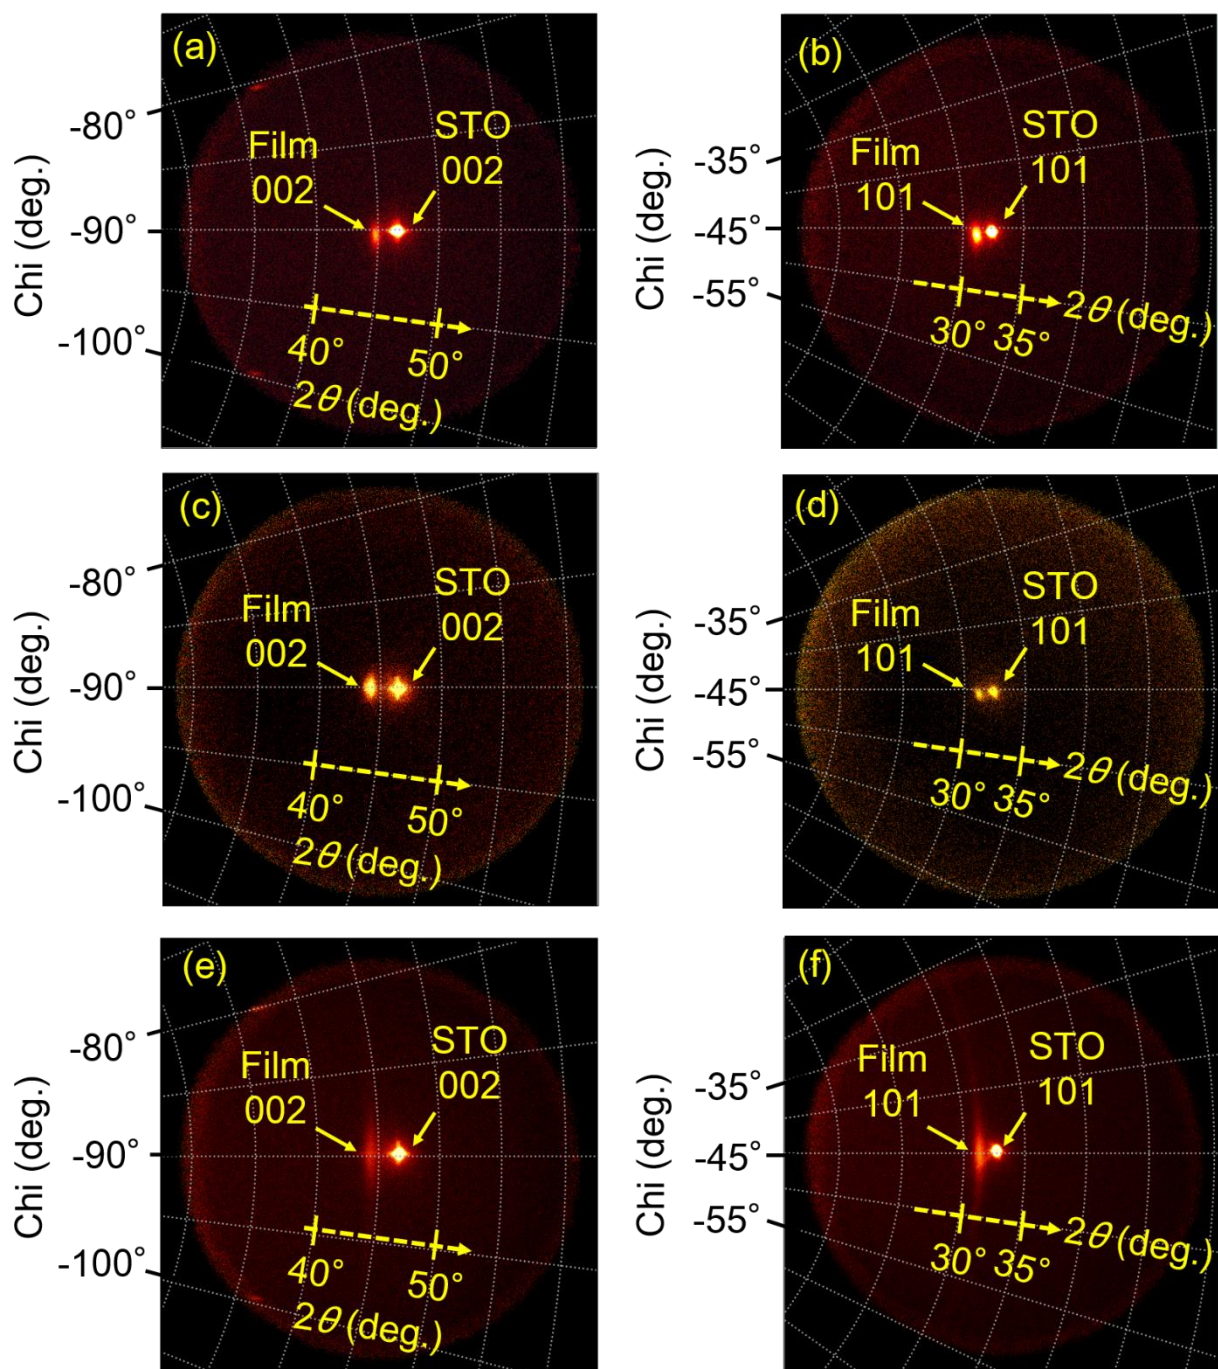

**Figure S3.** Two-dimensional  $2\theta$ - $\chi$  images of the (a, b)  $\text{EuNbO}_{2.4}\text{N}_{0.6}$ , (c, d)  $\text{EuNbO}_{2.3}\text{N}_{0.7}$ , and (e, f)  $\text{EuNbO}_{2.0}\text{N}_{1.0}$  films deposited on STO at  $\chi = 90^\circ$  and  $45^\circ$ .

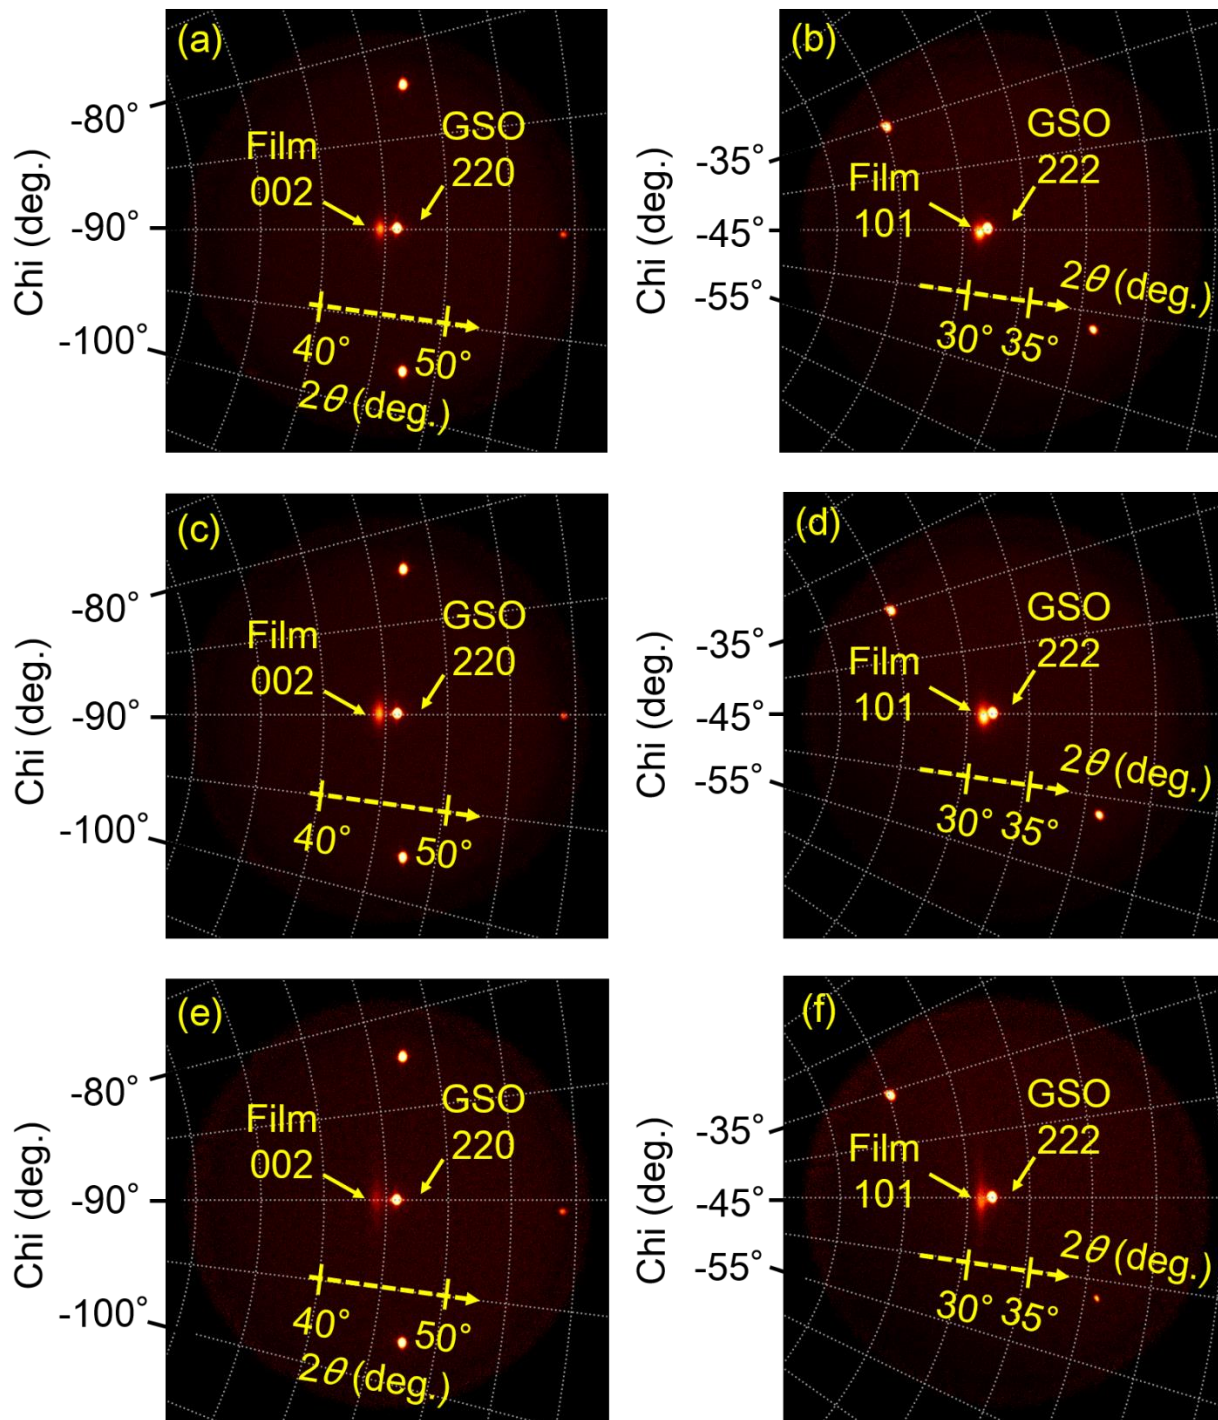

**Figure S4.** Two-dimensional  $2\theta$ - $\chi$  images of the (a, b)  $\text{EuNbO}_{2.4}\text{N}_{0.6}$ , (c, d)  $\text{EuNbO}_{2.3}\text{N}_{0.7}$ , and (e, f)  $\text{EuNbO}_{2.0}\text{N}_{1.0}$  films deposited on GSO at  $\chi = 90^\circ$  and  $45^\circ$ .

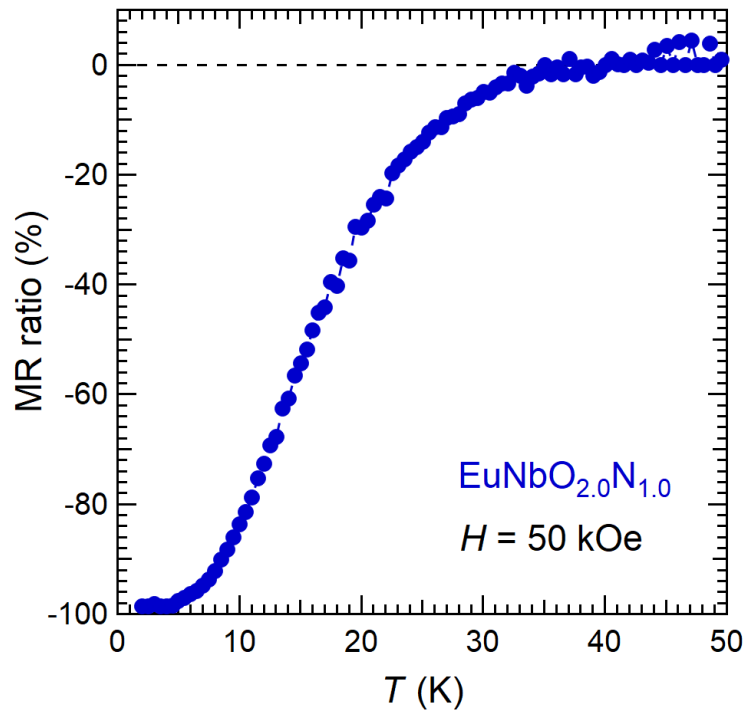

**Figure S5.** Temperature dependence of the MR ratio under 50 kOe for the  $\text{EuNbO}_{2.0}\text{N}_{1.0}$  film deposited on GSO.
